# Supplementary material for: Evaluation of the ARKRAY HA-8190V instrument for HbA1c
Source: publisher site journal article supplement (doi:10.1515/cclm-2020-1300), 2020-12-24
Supplement: Supplementary file 1 [file j_cclm-2020-1300_suppl_002.pdf]

Supplementary Figure 2 – Common Hb variants

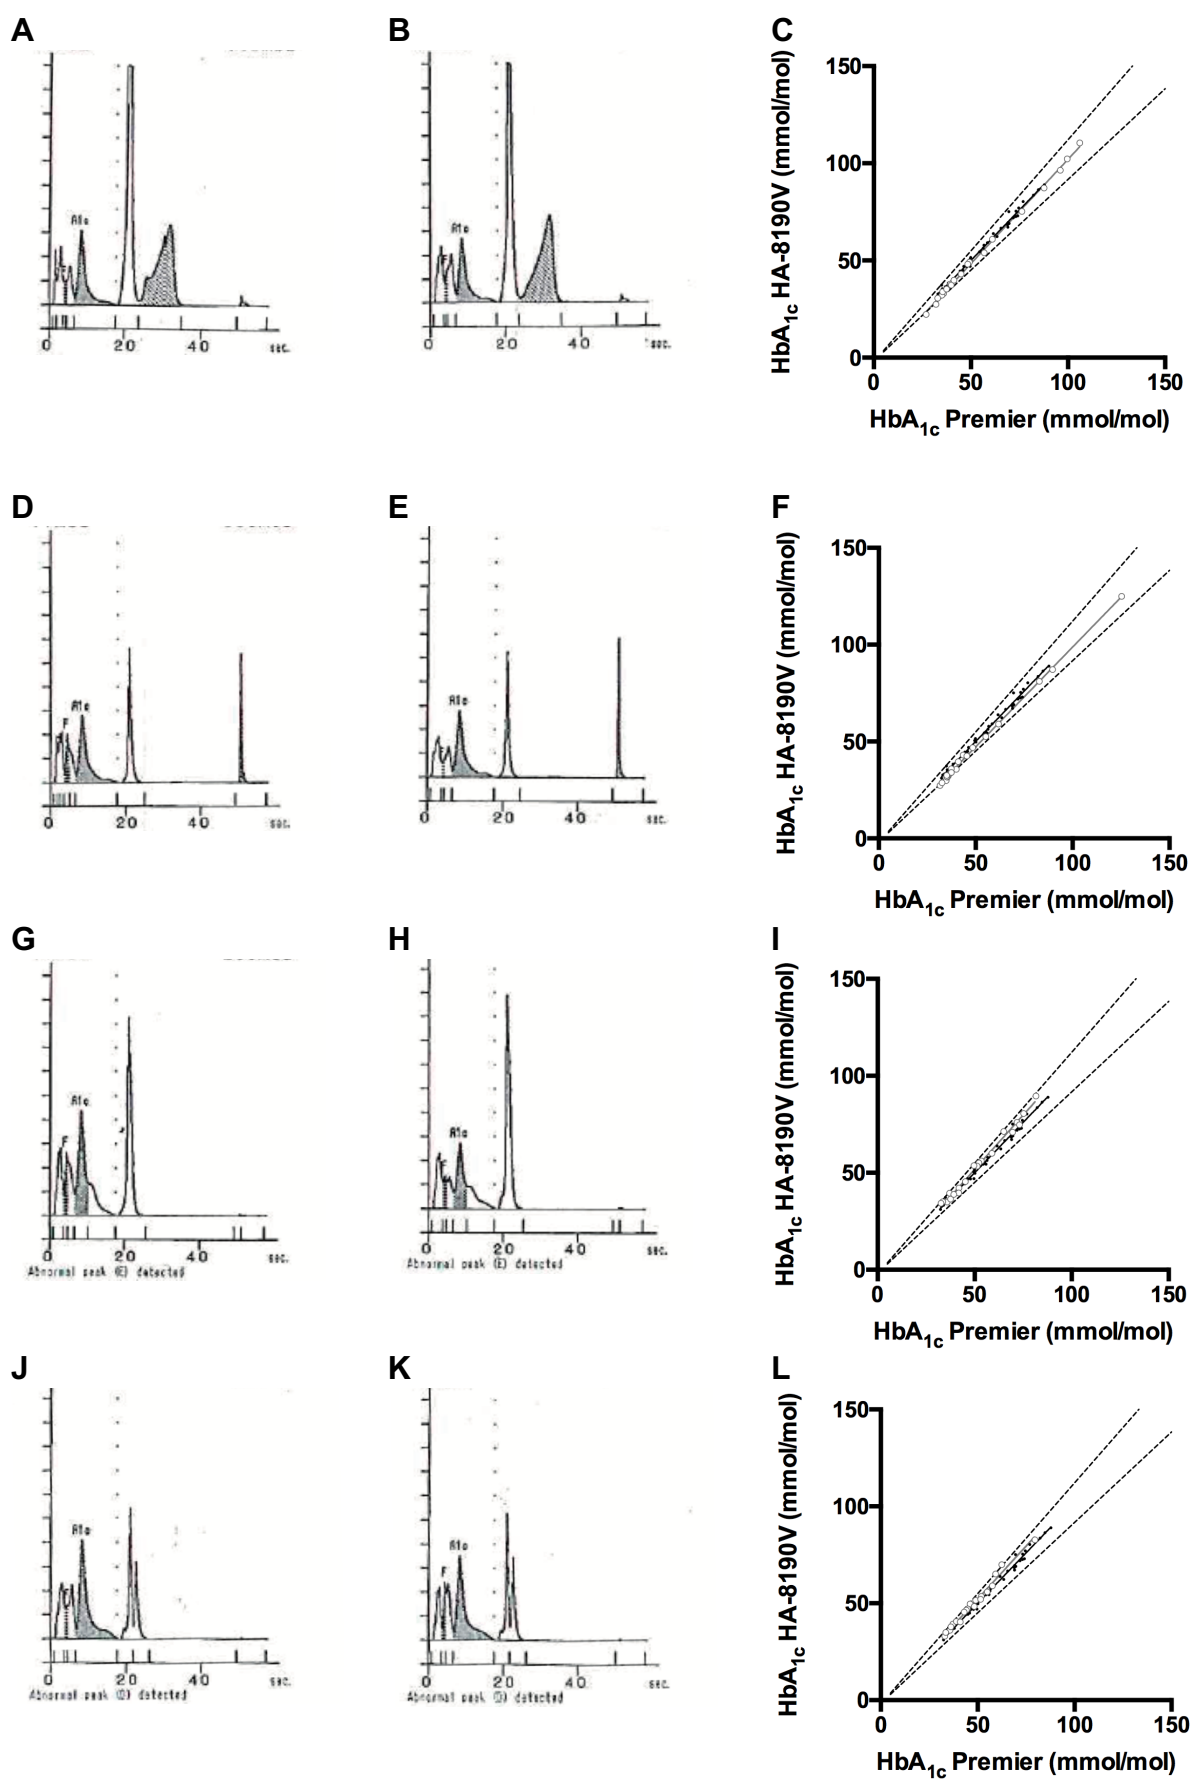

**Supplementary Figure 2 – Common Hb variants.** Representative chromatograms and Deming regression analysis of HbA<sub>1c</sub> quantification for Hb variants (grey dots and line) with ARKRAY HA-8190V vs Trinity Premier Hb9210. As control and quality criteria, HbA patient samples were used (black dots and line), dotted lines represent 10% limits around HbA regression line. **A-C.** HbAS **D-E.** HbAC **G-I** HbAE **J-L** HbAD.
