# Supplementary material for: Evaluation of the ARKRAY HA-8190V instrument for HbA1c
Source: publisher site journal article supplement (doi:10.1515/cclm-2020-1300), 2020-12-24
Supplement: Supplementary file 2 [file j_cclm-2020-1300_suppl_003.pdf]

### Supplementary Figure 3 – Elevated HbA2 and HbF

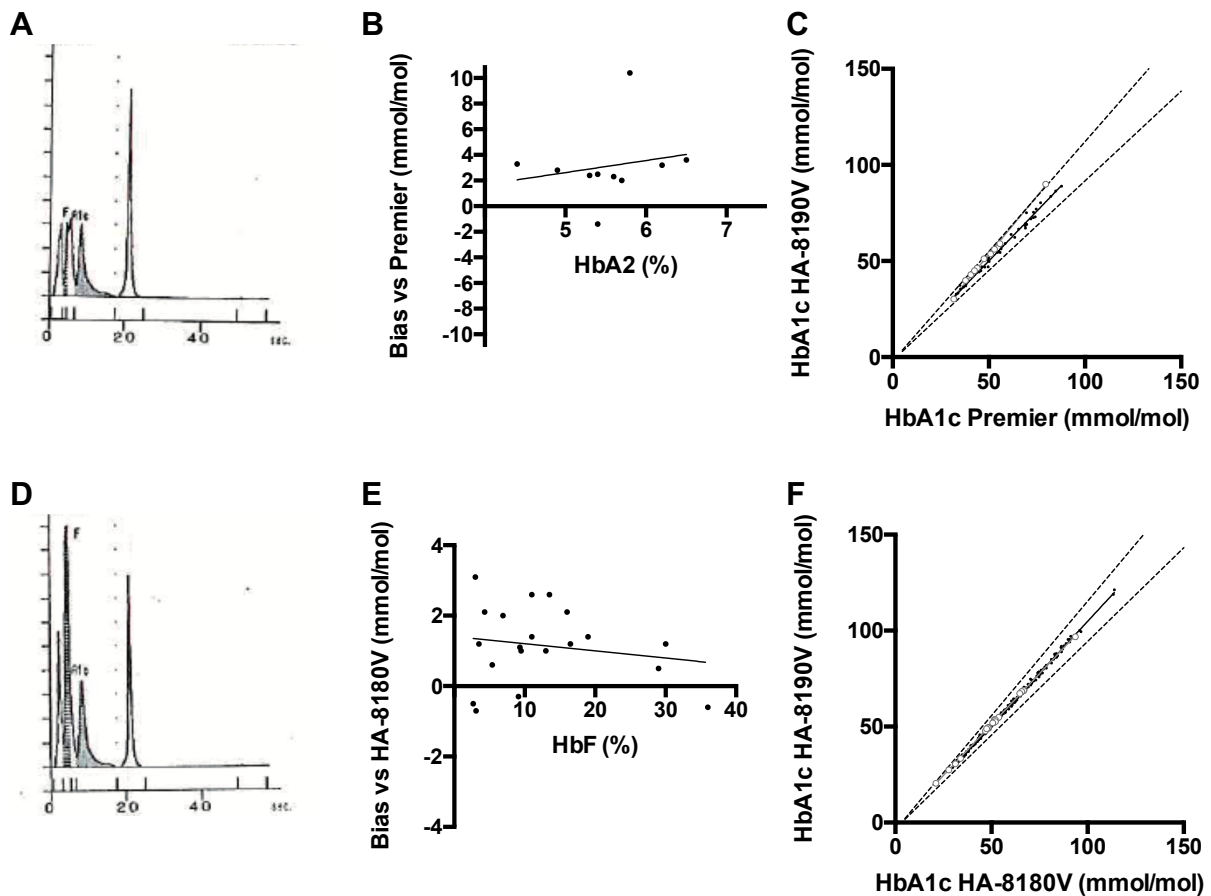

**Supplementary Figure 3 – Elevated HbA2 and HbF.** **A.** Representative chromatogram for elevated HbA2. **B.** Bias vs target value (Trinity Premier Hb9210) as compared to the % of elevated HbA2 (n=10, HbA2 4.4 – 6.5%). **C.** Deming regression analysis of HbA<sub>1c</sub> quantification for elevated HbA2 (grey dots and line) with ARKRAY HA-8190V vs Trinity Premier Hb9210. As control and quality criteria normal level HbA2 patient samples were used (black dots and line), dotted lines represent 10% limits around HbA regression line. **D.** Representative chromatogram for elevated HbF. **E.** Bias vs target value (ARKRAY HA-8180V) as compared to the % of elevated HbF (n=20, HbF 2.7 – 36%). **F.** Deming regression analysis of HbA<sub>1c</sub> quantification for elevated HbF.
