# Supplementary material for: Evaluation of the ARKRAY HA-8190V instrument for HbA1c
Source: publisher site journal article supplement (doi:10.1515/cclm-2020-1300), 2020-12-24
Supplement: Supplementary file 3 [file j_cclm-2020-1300_suppl_004.pdf]

# **Supplementary Figure 4 – Homozygous Hb variants and uncommon Hb variants**

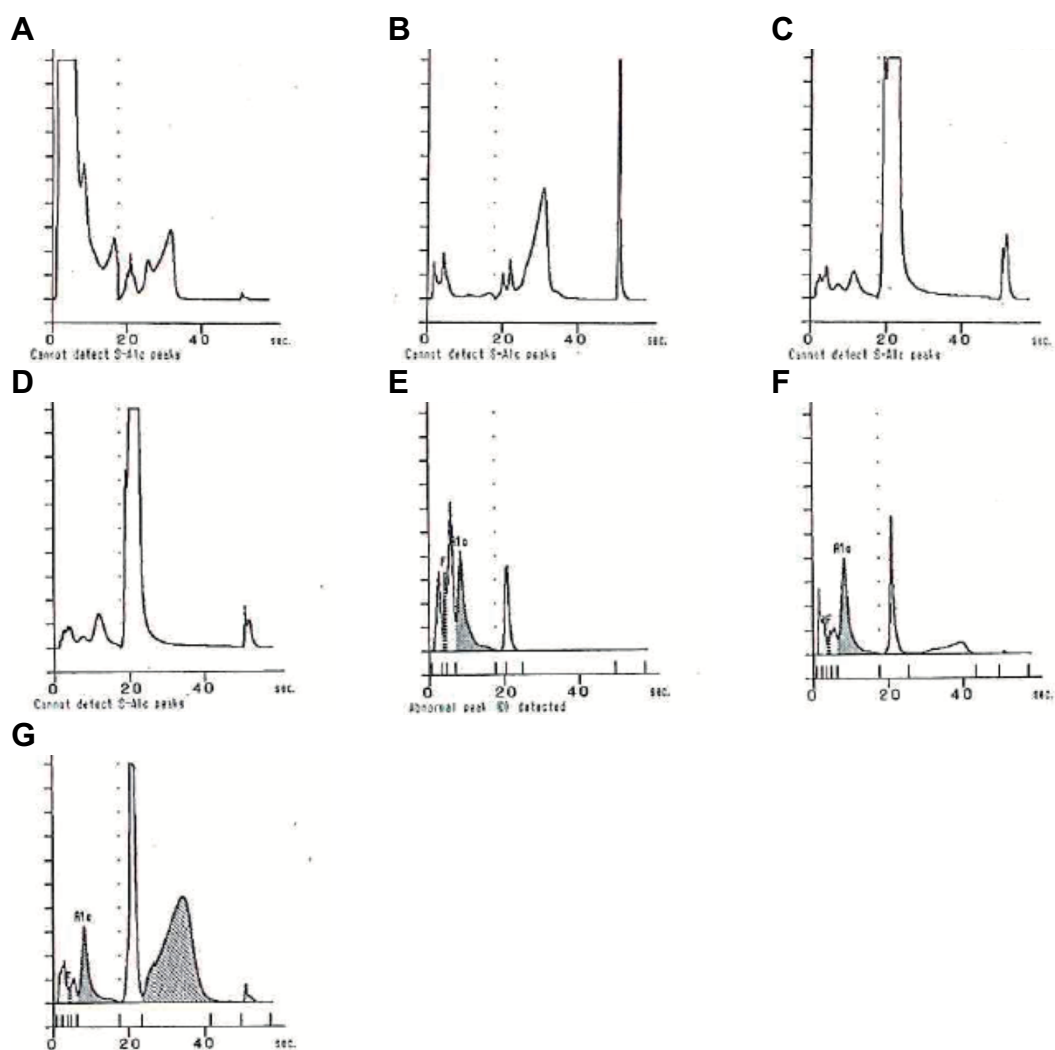

**Supplementary Figure 4 – Homozygous Hb variants and uncommon Hb variants.** Chromatograms of **A.** HbSS **B.** HbSC **C.** HbEE **D.** HbDD. **E.** HbAJ. **F.** HbAO-Arab **G.** HbAQ-Iran.
